# Supplementary figures and images for: Nutritional Status and Feeding Behavior Problems of Turkish Children with Special Learning Disabilities
Source: Research Square preprint supplement (doi:10.21203/rs.3.rs-1739439/v1), 2022-06-16

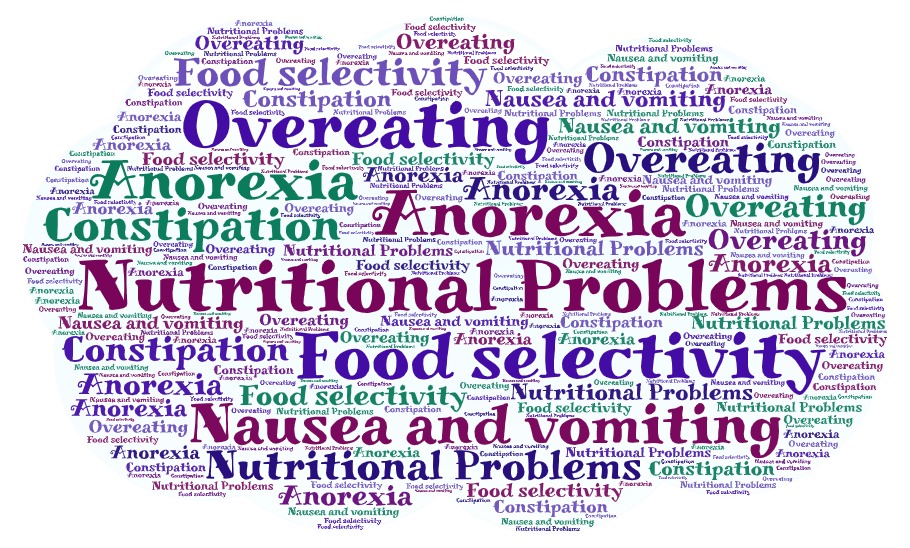


**Figure 1**: Nutritional problems in children

Supplement: Supplementary file 1 [file f0fd49949d20f77d2a7f2a39.docx]
